# Supplementary material
Source: Research Square preprint supplement (doi:10.21203/rs.3.rs-6845568/v1)
Supplement: Supplementary file 1 [file 002f17f1b26068a89e2b6a0a.docx]

**supplementary 1: Interview guide**

**Purpose of the Study**:

This study aims to: 1) identify challenges and solutions in providing primary health care; 2) identify and introduce the best options for providing primary health care to refugees in Iran through interviews with key individuals with diverse professional backgrounds in the field of primary health care.

**Confidentiality and Consent**:

All responses will be kept confidential. Participation is voluntary, and participants can withdraw at any time without any consequences. Please indicate your consent to participate and allow recording of the interview by signing below:

**Consent**: Yes [ ] No [ ]
**Recording Permission**: Yes [ ] No [ ]
**Signature of Participant**: ___________________
**Date**: ___________________

**Section 1: Demographic characteristics**

**Age:** ………. yr

**Gender:** Male[ ] Female[ ]

**Education:** Postgraduate Diploma [ ] Bachelor's Degree[ ] Master's Degree [ ] General physician [ ] PhD [ ]

**experiences:** ………yr

**Section 2: Background and Professional Experience**

1. Please describe your role and professional experience in the healthcare sector, particularly your experience with provided primary health care to refugess.

2. What has been your involvement with provided primary health care to refugess in Iran?

**Section 3: Main questions**

(1) What is your general view on providing primary health care services to refugees?

(2) What are the most important challenges of providing primary health care services to refugees?

(3) What are your concrete and operational suggestions and solutions to overcome the mentioned challenges?

(4) Which are the needs of refugee health care?

(5) How should the health care of refugees be organized in the future?

-How should primary health care be provided to refugees?

- Where should these services be provided?

- Who should provide them?

**Section 4: Closing**:
Thank you for your time and valuable insights. Your participation is greatly appreciated. If needed, may we contact you for additional clarification?
**Permission for Follow-up**: Yes [ ] No [ ]

Contact Information:

- Name: ___________________
- Email: ___________________
- Phone: ___________________

Kind Regards,

Representative of the research team

salman bashzar

+989136819705
